# Supplementary material
Source: Springer Nature journal article supplement (https://mijn.bsl.nl/resource/supplementary/13047_2010_341_MOESM1_ESM.pdf/7110534)

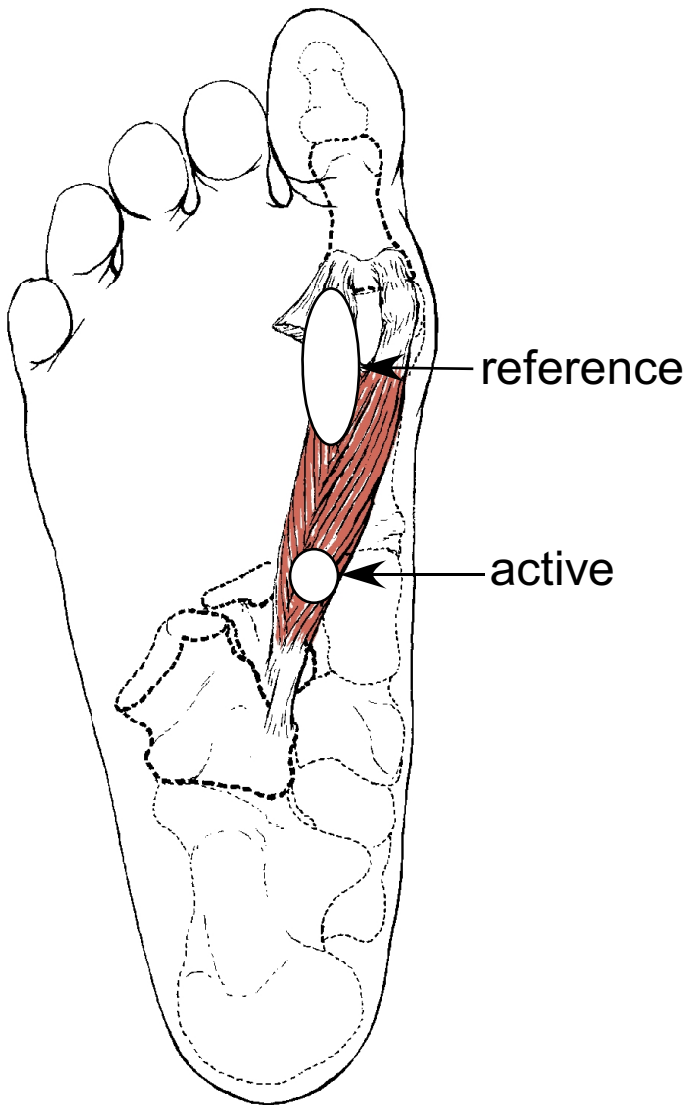

Supplement: MOESM1 [file 7110534]
